# Supplementary material for: Exogenous phosphorus compounds interact with nitrogen availability to regulatedynamics of soil inorganic phosphorus fractions in a meadow steppe
Source: Copernicus journal article supplement (doi:10.5194/bg-2019-173), 2019-06-11
Supplement: Supplementary file 1 [file bg-2019-173-supplement.pdf]

**Table S1** The results of ANCOVA (*F* values) testing the differences in slope between the two N treatments (N effect, without N vs. with N) for each P compound and between the two P compounds (P compound effect,  $K_2HPO_4$  vs.  $Ca(H_2PO_4)_2$ ) for each N treatment of the inorganic phosphorus fractions of Al-P, Fe-P,  $Ca_2$ -P and  $Ca_8$ -P, respectively.

|           | N addition effect |                 | P compound effect |            |
|-----------|-------------------|-----------------|-------------------|------------|
|           | $KH_2PO_4$        | $Ca(H_2PO_4)_2$ | Without N         | N addition |
| Al-P      | 5.54**            | 10.72**         | 3.29*             | 12.48**    |
| Fe-P      | 2.84*             | 4.92**          | 2.93*             | 8.85**     |
| $Ca_2$ -P | 2.72*             | 2.85*           | 3.57*             | 15.86*     |
| $Ca_8$ -P | 5.01**            | 2.69*           | 5.11**            | 10.69**    |

\*, \*\* Significance level at 0.05 and 0.01, respectively

**Table S2** The results of Student t-test (*P* values) determining the effects of P compounds on inorganic P fractions of Ca<sub>10</sub>-P, O-P, Olsen P and TP concentrations within each P addition rate without and with N addition, respectively.

|            | P rates (kg P ha <sup>-1</sup> yr <sup>-1</sup> ) | Ca <sub>10</sub> -P | O-P    | Olsen-P | TP   |
|------------|---------------------------------------------------|---------------------|--------|---------|------|
| Without N  | 0                                                 | < 0.01              | 0.78   | 0.37    | 0.43 |
|            | 20                                                | < 0.01              | 0.08   | 0.91    | 0.19 |
|            | 40                                                | < 0.01              | 0.08   | 0.60    | 0.36 |
|            | 60                                                | 0.15                | 0.21   | 0.44    | 0.87 |
|            | 80                                                | 0.04                | 0.30   | 0.07    | 0.17 |
|            | 100                                               | 0.02                | 0.38   | 0.02    | 0.70 |
| N addition | 0                                                 | 0.02                | < 0.01 | 0.44    | 0.98 |
|            | 20                                                | 0.09                | 0.71   | 0.27    | 0.17 |
|            | 40                                                | 0.02                | 0.26   | 0.13    | 0.11 |
|            | 60                                                | 0.06                | 0.02   | 0.30    | 0.35 |
|            | 80                                                | 0.18                | < 0.01 | 0.35    | 0.17 |
|            | 100                                               | < 0.01              | 0.49   | < 0.01  | 0.05 |

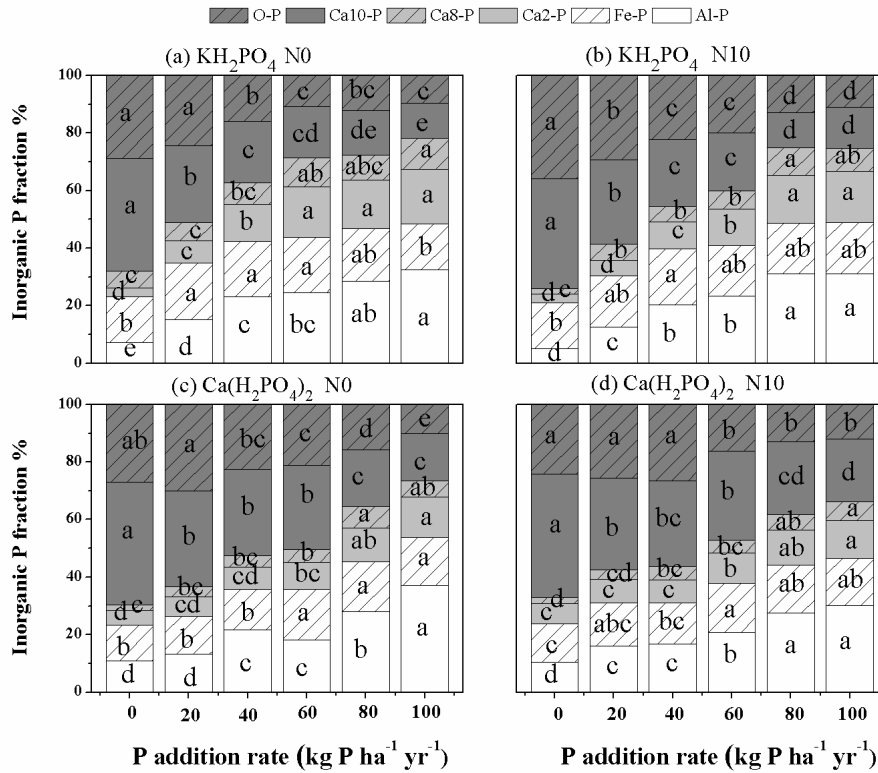

**Fig. S1** The soil inorganic phosphorus fractions of variscite (Al-P), strengite (Fe-P), dicalcium phosphate (Ca<sub>2</sub>-P), soil octacalcium phosphate (Ca<sub>8</sub>-P), hydroxylapatite (Ca<sub>10</sub>-P) and occluded P (O-P) expressed as a percentage of total inorganic phosphorus as affected by KH<sub>2</sub>PO<sub>4</sub> and Ca(H<sub>2</sub>PO<sub>4</sub>)<sub>2</sub> addition without (N<sub>0</sub>) or with N addition (100 kg N ha<sup>-1</sup> yr<sup>-1</sup>, N<sub>10</sub>). Letters indicate significance among P addition rates for one fraction within one P type and addition rate.

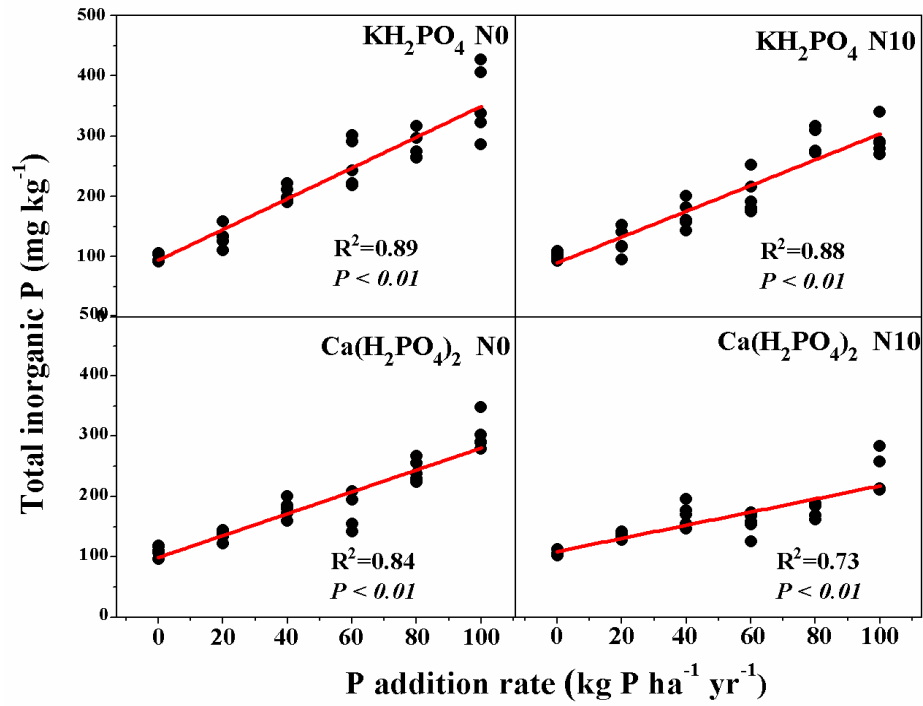

**Fig. S2** Relationships between soil total inorganic phosphorus and phosphorus addition levels under KH<sub>2</sub>PO<sub>4</sub> and Ca(H<sub>2</sub>PO<sub>4</sub>)<sub>2</sub> additions without (N<sub>0</sub>) or with N addition (100 kg N ha<sup>-1</sup> yr<sup>-1</sup>, N<sub>10</sub>).
